# Supplementary material for: Effective cataract surgical coverage: An indicator for measuring quality-of-care in the context of Universal Health Coverage
Source: PubMed Central journal article supplement (PMC5382971; doi:10.1371/journal.pone.0172342), 2017-03-01
Supplement: pone.0172342.s001.pdf [file pone.0172342.s001.pdf]

S1 Table: Code used to derive variables for analysis

| Variable            | Definition                                                                                                                                                                                                       | Code from RAAB dataset                                                                                                                                                         |
|---------------------|------------------------------------------------------------------------------------------------------------------------------------------------------------------------------------------------------------------|--------------------------------------------------------------------------------------------------------------------------------------------------------------------------------|
| x                   | individuals with unilateral pseudo/aphakia (i.e. operated cataract) and operable cataract in the other eye                                                                                                       | (bvare >2 & causere=3 & lere=2 & lele ≥3 & lele ≤5)<br>OR<br>(bvale >2 & causele=3 & lele=2 & lere ≥3 & lere ≤5)                                                               |
| y                   | individuals with bilateral pseudo/aphakia, regardless of visual acuity                                                                                                                                           | lere≥3 & lere≤5 & lele≥3 & lele ≤5                                                                                                                                             |
| z                   | individuals with bilateral operable cataract                                                                                                                                                                     | bvare > 2 & lere = 2 & bvale>2 & lele=2                                                                                                                                        |
| a                   | individuals with unilateral pseudo/aphakia achieving presenting visual acuity of 6/18 or better in the operated eye and operable cataract in the other eye                                                       | (bvale >2 & causele=3 & lele=2 & lere ≥3 & lere≤5 & pvare=1) OR<br>(bvare >2 & causere=3 & lere=2 & lele ≥3 & lele ≤5 & pvare=1)                                               |
| b                   | individuals with bilateral pseudo/aphakia achieving presenting visual acuity of 6/18 or better in at least one eye                                                                                               | lere≥3 & lere≤5 & lele≥3 & lele ≤5 & (pvare=1 OR pvale=1)                                                                                                                      |
| CSO <sub>Good</sub> | presenting visual acuity of 6/18 or better in the operated eye of a person who had undergone unilateral cataract surgery, and the better eye of a person who had undergone bilateral cataract surgery            | (lere≥3 & lere≤5 & lele≥3 & lele ≤5 & [pvare=1 OR pvale=1]) OR<br>(lere≥3 & lere≤5 & [lele<3 OR lele >5] & pvare=1)<br>OR<br>(lele≥3 & lele≤5 & [lere<3 OR lere >5] & pvare=1) |
| CSO <sub>Poor</sub> | presenting visual acuity of worse than 6/60 or better in the operated eye of a person who had undergone unilateral cataract surgery, and the better eye of a person who had undergone bilateral cataract surgery | (lere≥3 & lere≤5 & lele≥3 & lele ≤5 & pvare>2 & pvale>2) OR<br>(lere≥3 & lere≤5 & [lele<3 OR lele >5] & pvare>2)<br>OR<br>(lele≥3 & lele≤5 & [lere<3 OR lere >5] & pvare>2)    |

Variables used to calculate:

Cataract surgical coverage:  $CSC_{\text{person <6/60}} = [(x + y)/(x + y + z)] * 100 (\%)$

Effective CSC:  $eCSC_{\text{person <6/60}} = [(a + b)/(x + y + z)] * 100 (\%)$

bvare/ bvale: pinhole visual acuity right/ left eye

causere/ causele: primary cause of reduced visual acuity right/ left eye

lere/ lele: Lens examination right/ left eye

pvare/ pvale: presenting visual acuity right/ left eye
